# Supplementary material for: Engineered cation vacancy plane responsible for the reduction in lattice thermal conductivity and improvement in the thermoelectric property of Ga2Te3-based semiconductors
Source: Royal Society of Chemistry journal article supplement (doi:10.1039/c4ra04463k), 2014-01-01
Supplement: c4ra04463k2.pdf [file c4ra04463k2.pdf]

Supplementary Figure 2

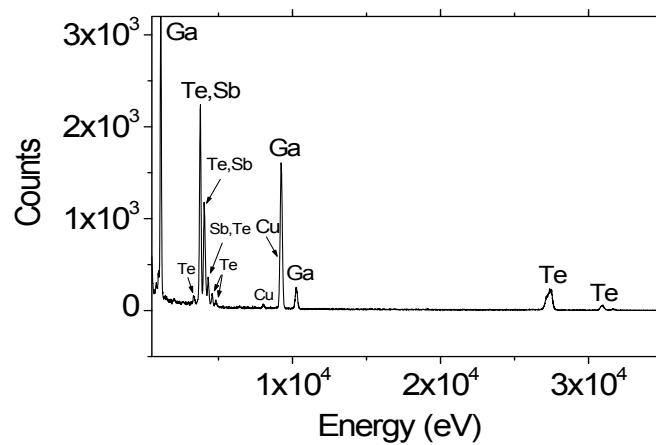

Supplementary Figure 2 The energy diffraction spectrum (EDS) of the alloy  $\text{Ga}_{1.9}\text{Cu}_{0.05}\text{Sb}_{0.1}\text{Te}_{2.95}$ .
