# Supplementary figures and images for: Engineered cation vacancy plane responsible for the reduction in lattice thermal conductivity and improvement in the thermoelectric property of Ga2Te3-based semiconductors
Source: Royal Society of Chemistry journal article supplement (doi:10.1039/c4ra04463k), 2014-01-01

Supplementary Figure 1

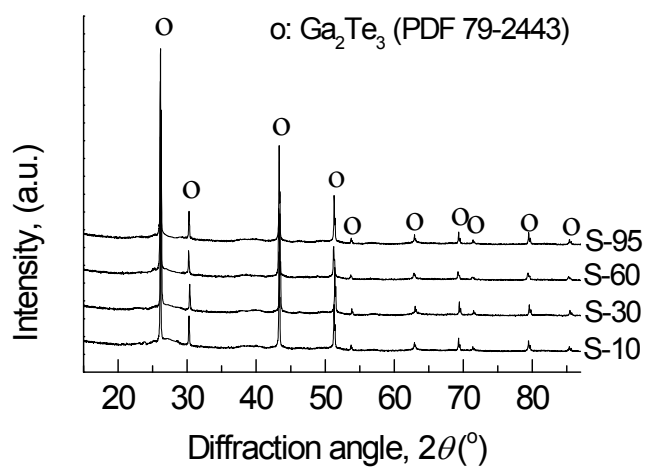

Supplementary Figure 1 XRD patterns of different samples.

Supplement: c4ra04463k1.pdf [file c4ra04463k1.pdf]
